# Supplementary material for: Erosional response of an actively uplifting mountain belt to cyclic rainfall variations
Source: Copernicus journal article supplement (doi:10.5194/esurf-3-1-2015), 2015-01-05
Supplement: Supplementary file 1 [file esurf-3-1-2015-supplement-cover-letter.pdf › esurf-3-1-2015-supplement-cover-letter.pdf]

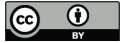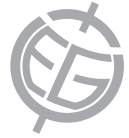

## *Supplement of*

# **Erosional response of an actively uplifting mountain belt to cyclic rainfall variations**

**J. Braun et al.**

*Correspondence to:* J. Braun ([jean.braun@ujf-grenoble.fr](mailto:jean.braun@ujf-grenoble.fr))

- [esurf-3-1-2015-supplement-cover-letter.pdf](#)
- [ErosionRateSmall.mp4](#)
- [\\_\\_MACOSX](#)
  - [.\\_ErosionRateSmall.mp4](#)
